# Supplementary material for: Copper(i) iodide cluster-based lanthanide organic frameworks: synthesis and application as efficient catalysts for carboxylative cyclization of propargyl alcohols with CO2 under mild conditions
Source: Royal Society of Chemistry journal article supplement (doi:10.1039/c9dt01859j), 2019-01-01
Supplement: c9dt01859j1.pdf [file c9dt01859j1.pdf]

## Supporting Information

### Copper(I) iodide cluster-based lanthanide organic frameworks: synthesis and application as efficient catalysts for carboxylative cyclization of propargyl alcohols with CO<sub>2</sub> under mild conditions

Zhilei Wu,<sup>ab</sup> Xingwang Lan,<sup>ab\*</sup> Yaxin Zhang,<sup>a</sup> Meng Li,<sup>a</sup> Guoyi Bai<sup>a\*</sup>

<sup>a</sup>Key Laboratory of Chemical Biology of Hebei Province, Key Laboratory of Analytical Science and Technology of Hebei Province, College of Chemistry and Environmental Science, Hebei University, Baoding, 071002, P. R. China.

<sup>b</sup>Key Laboratory for Green Chemical Technology of Ministry of Education, School of Chemical Engineering and Technology Collaborative Innovation Center of Chemical Science and Engineering, Tianjin University Weijin Road 92, Tianjin, 300072, P.R.China.

**Table S1** Crystallographic data and structure refinements for compounds **1** and **2**.

|                                                                              | <b>1</b>                                                                                      | <b>2</b>                                                                                                       |
|------------------------------------------------------------------------------|-----------------------------------------------------------------------------------------------|----------------------------------------------------------------------------------------------------------------|
| Formula                                                                      | C <sub>21</sub> H <sub>8</sub> Cu <sub>2</sub> DyI <sub>2</sub> N <sub>4</sub> O <sub>7</sub> | C <sub>63</sub> H <sub>80</sub> Cu <sub>2</sub> Gd <sub>2</sub> I <sub>2</sub> N <sub>15</sub> O <sub>21</sub> |
| Fw                                                                           | 971.69                                                                                        | 2078.80                                                                                                        |
| T/K                                                                          | 150(2)                                                                                        | 150(2)                                                                                                         |
| Cryst syst                                                                   | Tetragonal                                                                                    | Triclinic                                                                                                      |
| Space group                                                                  | <i>I</i> -42 <i>d</i>                                                                         | <i>P</i> -1                                                                                                    |
| <i>a</i> /Å                                                                  | 25.3670(4)                                                                                    | 12.9904(5)                                                                                                     |
| <i>b</i> /Å                                                                  | 25.3670(4)                                                                                    | 13.0609(5)                                                                                                     |
| <i>c</i> /Å <sup>3</sup>                                                     | 9.0667(2)                                                                                     | 13.4710(6)                                                                                                     |
| <i>α</i> /°                                                                  | 90                                                                                            | 65.919(2)                                                                                                      |
| <i>β</i> /°                                                                  | 90                                                                                            | 86.020(2)                                                                                                      |
| <i>γ</i> /°                                                                  | 90                                                                                            | 82.341(2)                                                                                                      |
| Volume/Å <sup>3</sup>                                                        | 7818.5(11)                                                                                    | 2067.76(15)                                                                                                    |
| Z                                                                            | 8                                                                                             | 1                                                                                                              |
| ρ <sub>calc</sub> /mg/mm <sup>3</sup>                                        | 2.212                                                                                         | 1.669                                                                                                          |
| μ/mm <sup>-1</sup>                                                           | 6.139                                                                                         | 2.910                                                                                                          |
| <i>F</i> (000)                                                               | 3584                                                                                          | 1023                                                                                                           |
| θ/°                                                                          | 2.539 to 26.378                                                                               | 2.198 to 25.010                                                                                                |
| Reflections collected                                                        | 41594                                                                                         | 30167                                                                                                          |
| Unique reflns                                                                | 2980 [R <sub>int</sub> =0.0502]                                                               | 7290 [R <sub>int</sub> =0.0571]                                                                                |
| GOF on <i>F</i> <sup>2</sup>                                                 | 1.087                                                                                         | 1.054                                                                                                          |
| <i>R</i> <sub>1</sub> , w <i>R</i> <sub>2</sub> ( <i>I</i> > 2σ( <i>I</i> )) | 0.0294, 0.0635                                                                                | 0.0304, 0.0610                                                                                                 |
| <i>R</i> <sub>1</sub> , w <i>R</i> <sub>2</sub> (all data)                   | 0.0322, 0.0647                                                                                | 0.0509, 0.0679                                                                                                 |

**Table S2.** Carboxylative cyclization of propargyl alcohol with CO<sub>2</sub>.<sup>a</sup>

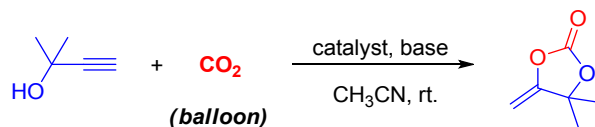

| Entry | Catalyst                       | Base                            | Yield <sup>b</sup> (%) |
|-------|--------------------------------|---------------------------------|------------------------|
| 1     | Dy <sub>2</sub> O <sub>3</sub> | DBU                             | <1                     |
| 2     | Gd <sub>2</sub> O <sub>3</sub> | DBU                             | 3                      |
| 3     | compound <b>1</b>              | Et <sub>3</sub> N               | Trace                  |
| 4     | compound <b>1</b>              | K <sub>2</sub> CO <sub>3</sub>  | 0                      |
| 5     | compound <b>1</b>              | Cs <sub>2</sub> CO <sub>3</sub> | Trace                  |

<sup>a</sup>Reaction conditions: 2-methyl-3-butyn-2-ol (0.6 mmol), catalyst (30 mg), base (1.0 equiv.), CH<sub>3</sub>CN (3 mL), CO<sub>2</sub> (balloon), 5 h, room temperature. <sup>b</sup> Determined by GC.

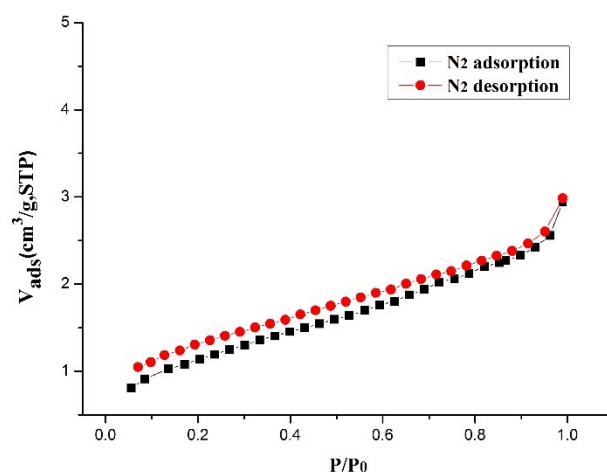

**Figure. S1** N<sub>2</sub> sorption isotherm of compound **1** at 77 K.

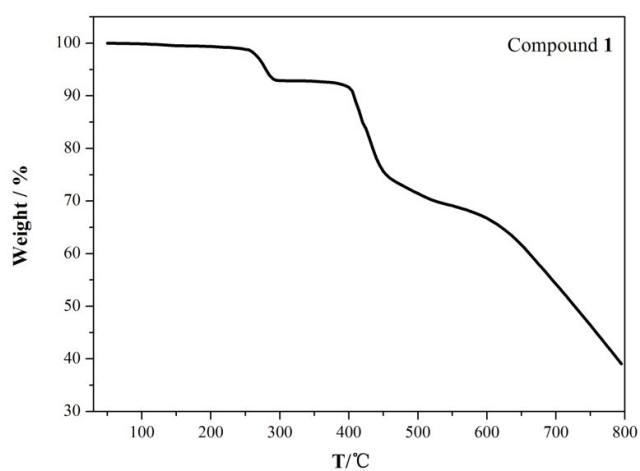

**Figure. S2** The TGA curve for compound **1**.

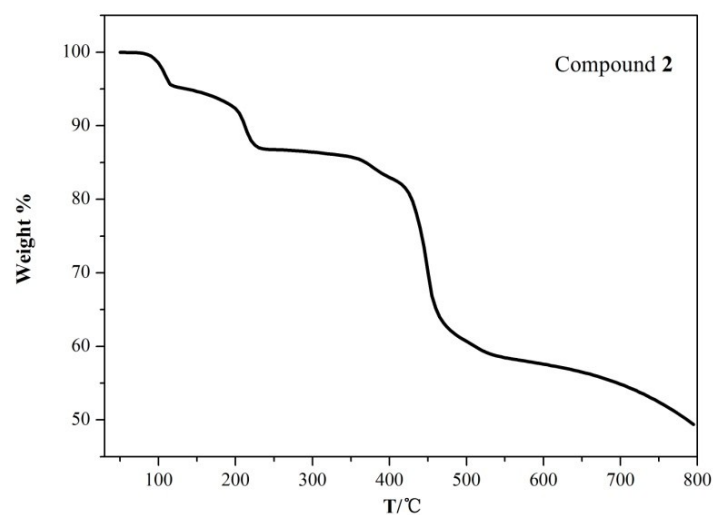

**Figure. S3** The TGA curve for compound 2.

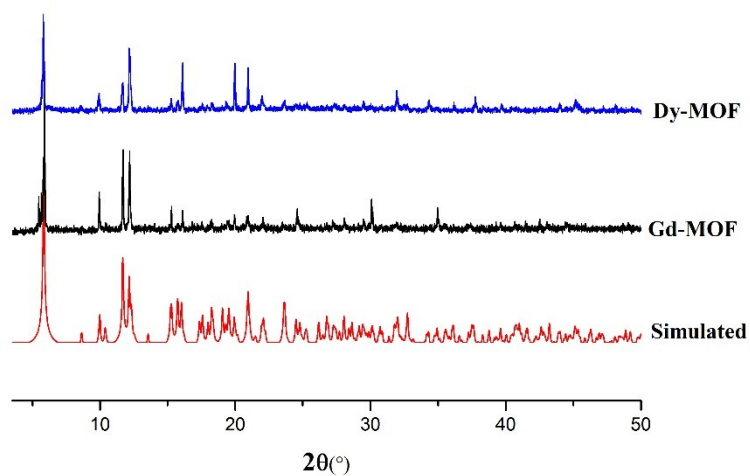

**Figure. S4** The PXRD patterns of Gd-MOF and Dy-MOF.

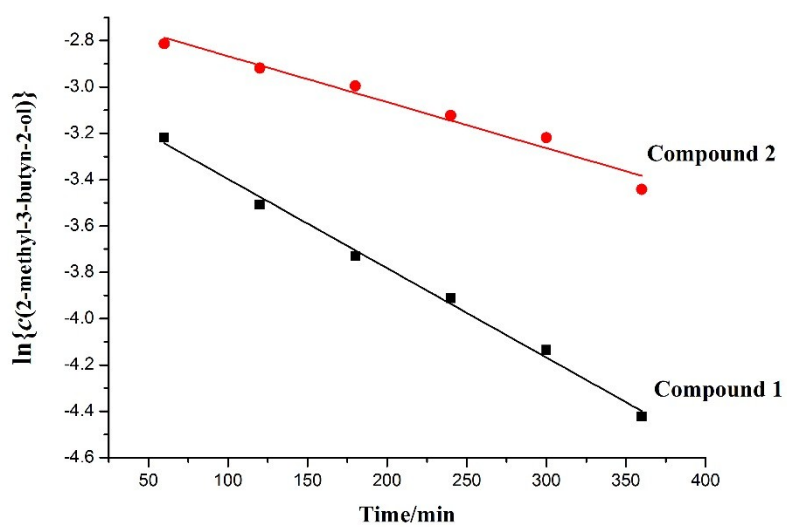

**Figure. S5** The kinetic study for compounds 1 and 2 in the reactions.

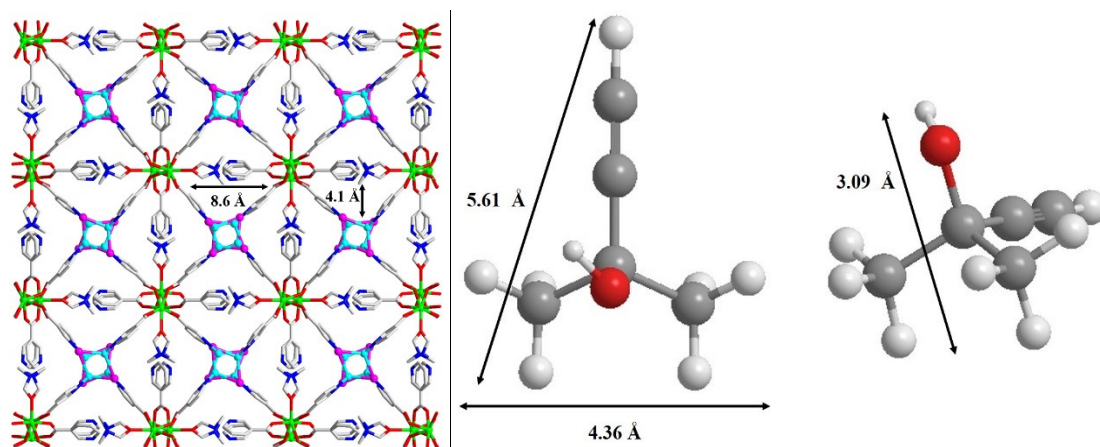

**Figure. S6** Perspective view of the framework of **1** along c direction (left) and the size of 2-methyl-3-butyn-2-ol.

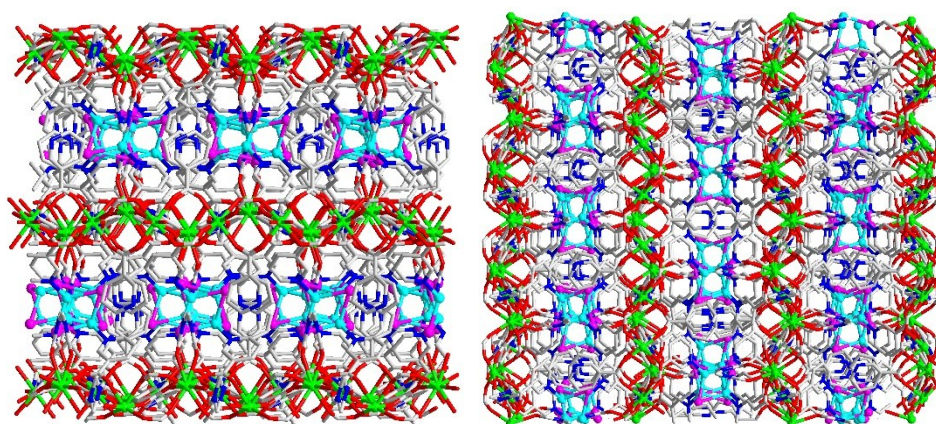

**Figure. S7** Perspective view of the framework of **1** along a direction (left) and b direction (right), respectively.

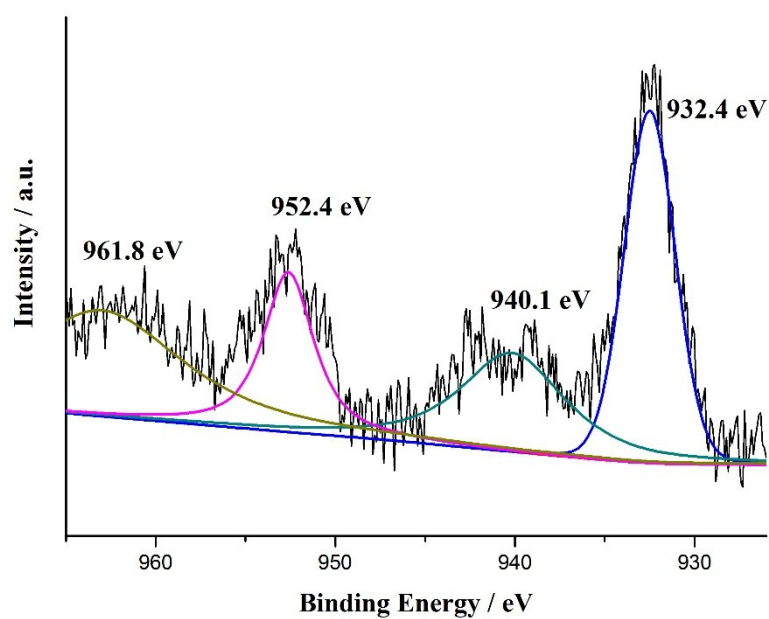

**Figure. S8** The XPS spectra of Cu(I) and Cu(II) in the reused **1**.

## Characterization Data of All Products

### 4,4-Dimethyl-5-methylene-1,3-dioxolan-2-one (**2a**):

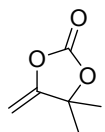

Colorless oil liquid.  $^1\text{H}$  NMR (600 MHz,  $\text{CDCl}_3$ )  $\delta$  (ppm) : 4.70 (d,  $J$  = 4.20 Hz, 1H), 4.24 (d,  $J$  = 4.20 Hz, 1H), 1.55 (s, 6H).  $^{13}\text{C}$  NMR (151 MHz,  $\text{CDCl}_3$ )  $\delta$  (ppm): 158.78, 151.26, 85.26, 84.61, 27.58. GC-MS calcd. for  $\text{C}_6\text{H}_8\text{O}_3$  128.05, found 128.10.

### 4-Ethyl-4-methyl-5-methylene-1,3-dioxolan-2-one (**2b**)

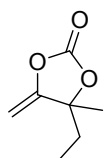

Colorless oil liquid.  $^1\text{H}$  NMR (600 MHz,  $\text{CDCl}_3$ )  $\delta$  (ppm) : 4.82 (d,  $J$  = 3.60 Hz, 1H), 4.28 (d,  $J$  = 3.60 Hz, 1H), 1.95-1.89 (m, 1H), 1.80-1.74 (m, 1H), 1.59 (s, 3H).  $^{13}\text{C}$  NMR (151 MHz,  $\text{CDCl}_3$ )  $\delta$  (ppm): 157.45, 151.53, 87.57, 85.54, 33.38, 25.93, 7.30. GC-MS calcd. for  $\text{C}_7\text{H}_{10}\text{O}_3$  142.06, found 142.08.

### 4,4-Diethyl-5-methylene-1,3-dioxolan-2-one (**2c**)

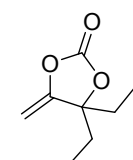

Colorless oil liquid.  $^1\text{H}$  NMR (600 MHz,  $\text{CDCl}_3$ )  $\delta$  (ppm) : 4.87 (d,  $J$  = 4.2 Hz, 1H), 4.23 (d,  $J$  = 4.20 Hz, 1H), 1.97-1.91 (m, 2H), 1.75-1.69 (m, 2H), 0.98 (t,  $J$  = 7.20 Hz, 6H).  $^{13}\text{C}$  NMR (151 MHz,  $\text{CDCl}_3$ )  $\delta$  (ppm) : 155.81, 151.85, 90.83, 85.78, 31.90, 7.10. GC-MS calcd. for  $\text{C}_8\text{H}_{12}\text{O}_3$  156.08, found 156.13.

### 4-Isopropyl-4-methyl-5-methylene-1,3-dioxolan-2-one (**2d**)

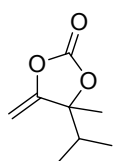

Colorless oil liquid.  $^1\text{H}$  NMR (600 MHz,  $\text{CDCl}_3$ )  $\delta$  (ppm) : 4.82 (d,  $J$  = 4.20 Hz, 1H), 4.28 (d,  $J$  = 3.60 Hz, 1H), 1.97-1.93 (m, 1H), 1.58 (s, 3H), 1.03 (d,  $J$  = 7.20 Hz, 3H), 1.00 (d,  $J$  = 6.60 Hz, 3H).  $^{13}\text{C}$  NMR (151 MHz,  $\text{CDCl}_3$ )  $\delta$  (ppm): 157.13, 151.68, 89.80, 86.17, 36.96, 24.00, 16.31, 16.01. GC-MS calcd. for  $\text{C}_8\text{H}_{12}\text{O}_3$  156.08, found 156.13.

### 4-Isobutyl-4-methyl-5-methylene-1,3-dioxolan-2-one (**2e**)

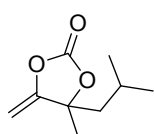

Colorless oil liquid.  $^1\text{H}$  NMR (600 MHz,  $\text{CDCl}_3$ )  $\delta$  (ppm) : 4.79 (d,  $J$  = 1.80 Hz, 1H), 4.27 (d,  $J$  = 1.80, 1H), 1.85-1.79 (m, 2H), 1.68-1.65 (m, 1H), 1.58 (s, 2H), 0.97 (dd,  $J_1$  = 6.60 Hz,  $J_2$  = 4.20 Hz, 6H).  $^{13}\text{C}$  NMR (151 MHz,  $\text{CDCl}_3$ )  $\delta$  (ppm): 158.34, 151.45, 87.32, 85.55, 48.53, 27.00, 24.28, 23.96, 23.66. GC-MS calcd. for  $\text{C}_9\text{H}_{14}\text{O}_3$  170.09, found 170.08.

### 4-Methylene-1,3-dioxaspiro[4.5]decan-2-one (**2f**)

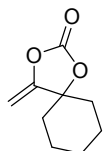

Colorless oil liquid.  $^1\text{H}$  NMR (600 MHz,  $\text{CDCl}_3$ )  $\delta$  (ppm): 4.76 (d,  $J$  = 3.00 Hz, 1H), 4.28 (d,  $J$  = 3.60 Hz, 1H), 2.0 (d,  $J$  = 4.80 Hz, 2H), 1.74-1.59 (m, 7H), 1.34-1.25 (m, 1H).  $^{13}\text{C}$  NMR (151 MHz,  $\text{CDCl}_3$ )  $\delta$  (ppm): 158.78, 151.48, 86.38, 85.46, 36.53, 24.37, 21.62. GC-MS calcd. for  $\text{C}_9\text{H}_{12}\text{O}_3$  168.08, found 168.06.

### 4-Methylene-1,3-dioxaspiro[4.4]nonan-2-one (**2g**)

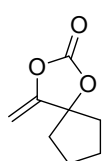

Colorless oil liquid.  $^1\text{H}$  NMR (600 MHz,  $\text{CDCl}_3$ )  $\delta$  (ppm) : 4.79 (d,  $J$  = 4.20 Hz, 1H), 4.33 (d,  $J$  = 4.20 Hz, 1H), 2.26-2.22 (m, 2H), 1.95-1.83 (m, 6H).  $^{13}\text{C}$  NMR (151 MHz,  $\text{CDCl}_3$ )  $\delta$  (ppm) : 157.82, 151.47, 94.20, 85.30, 40.66, 24.26. GC-MS calcd. for  $\text{C}_8\text{H}_{10}\text{O}_3$  154.06, found 154.03.

## Copies of NMR Spectra of All Products

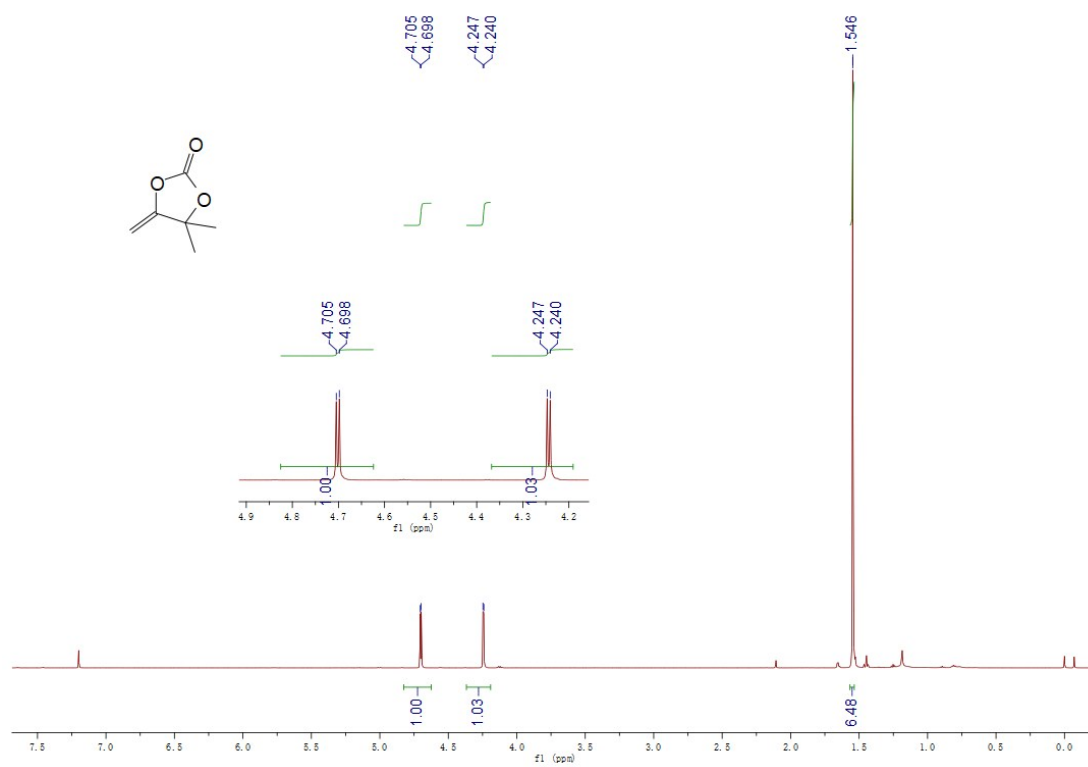

<sup>1</sup>H NMR spectrum of product **2a**

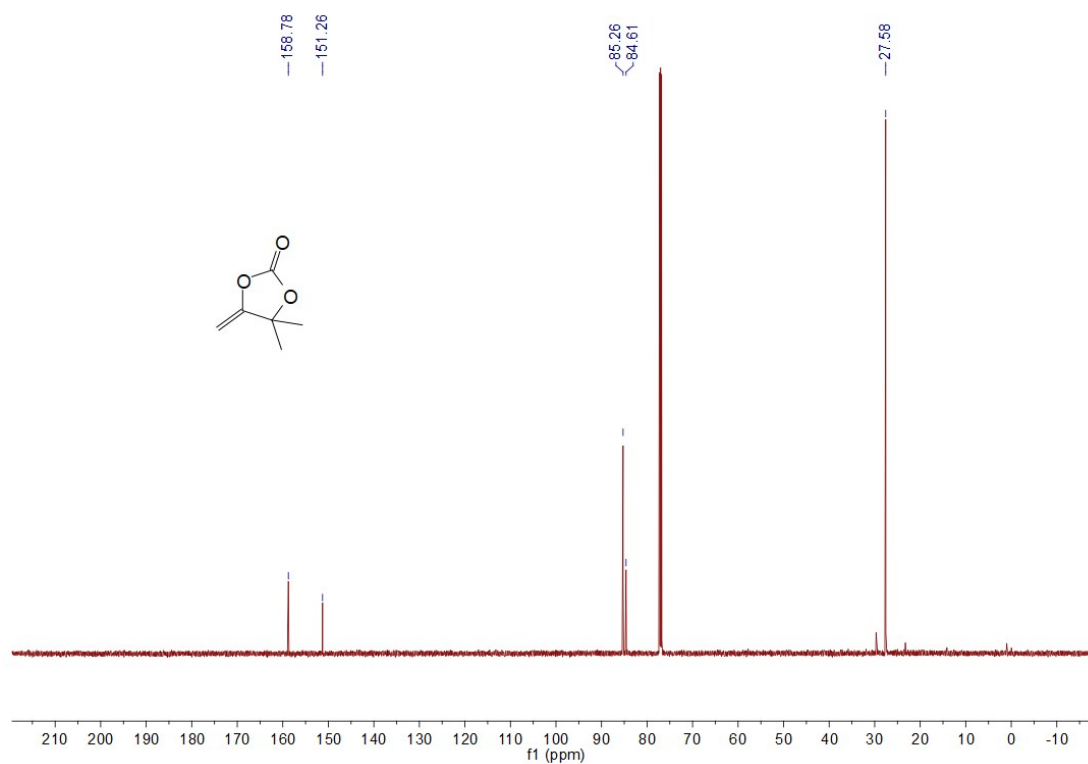

<sup>13</sup>C NMR spectrum of product **2a**

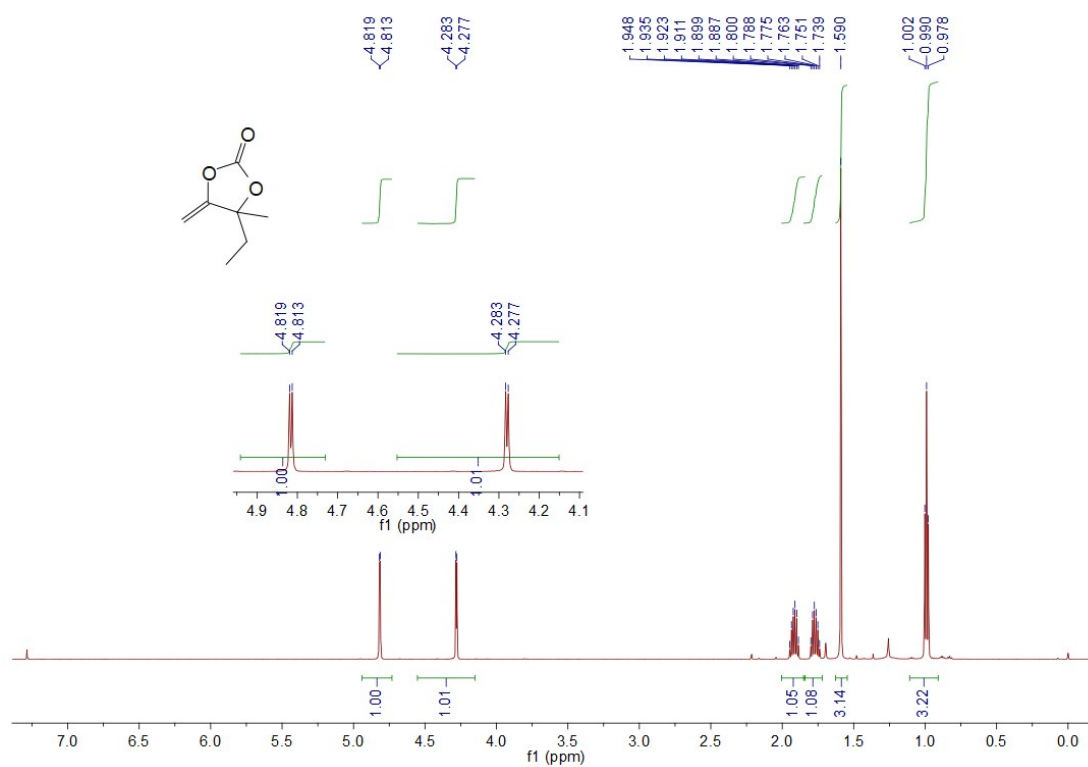

<sup>1</sup>H NMR spectrum of product **2b**

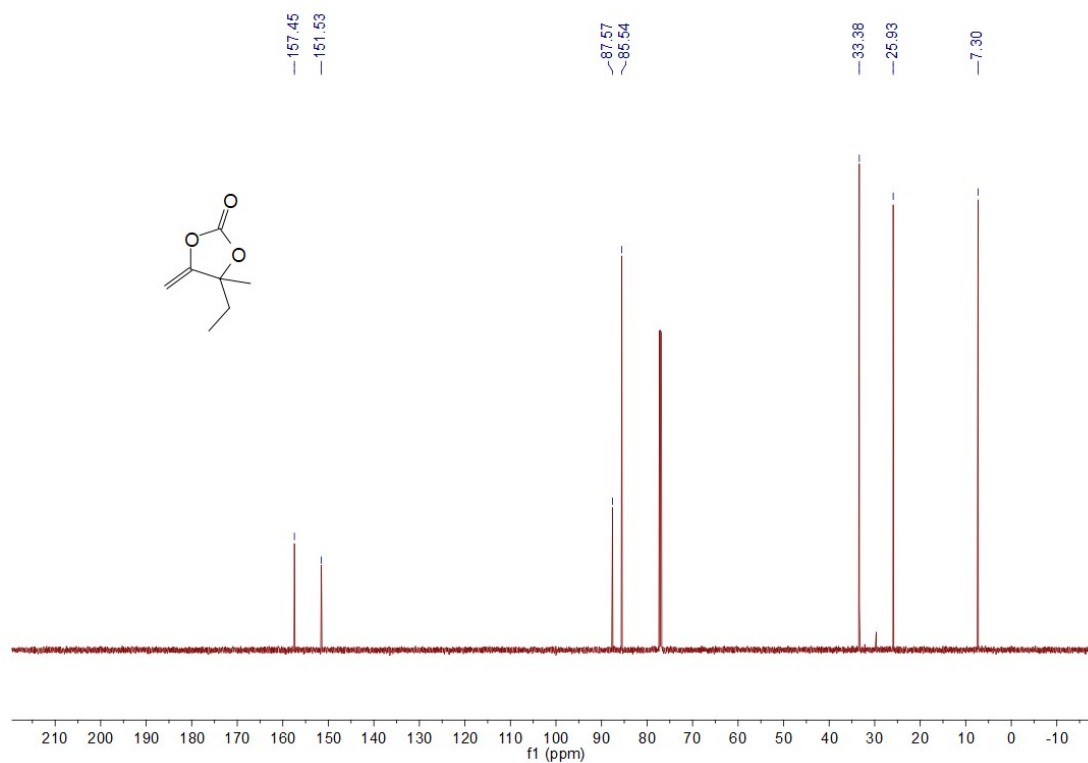

<sup>13</sup>C NMR spectrum of product **2b**

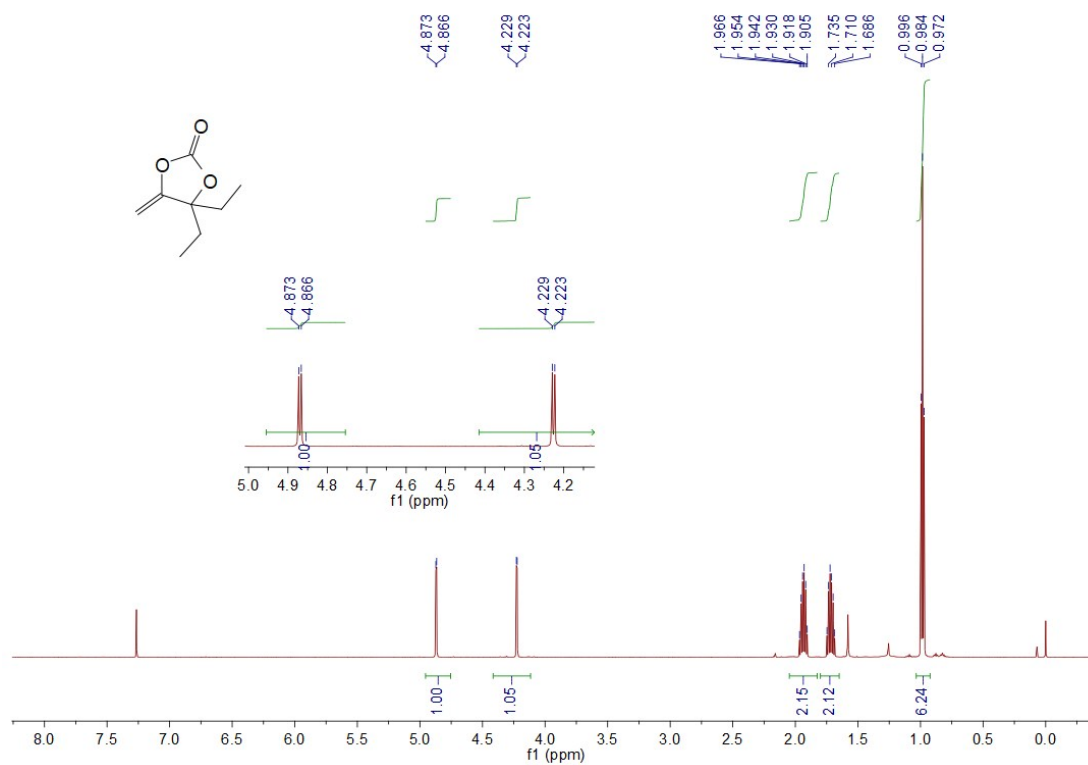

<sup>1</sup>H NMR spectrum of product **2c**

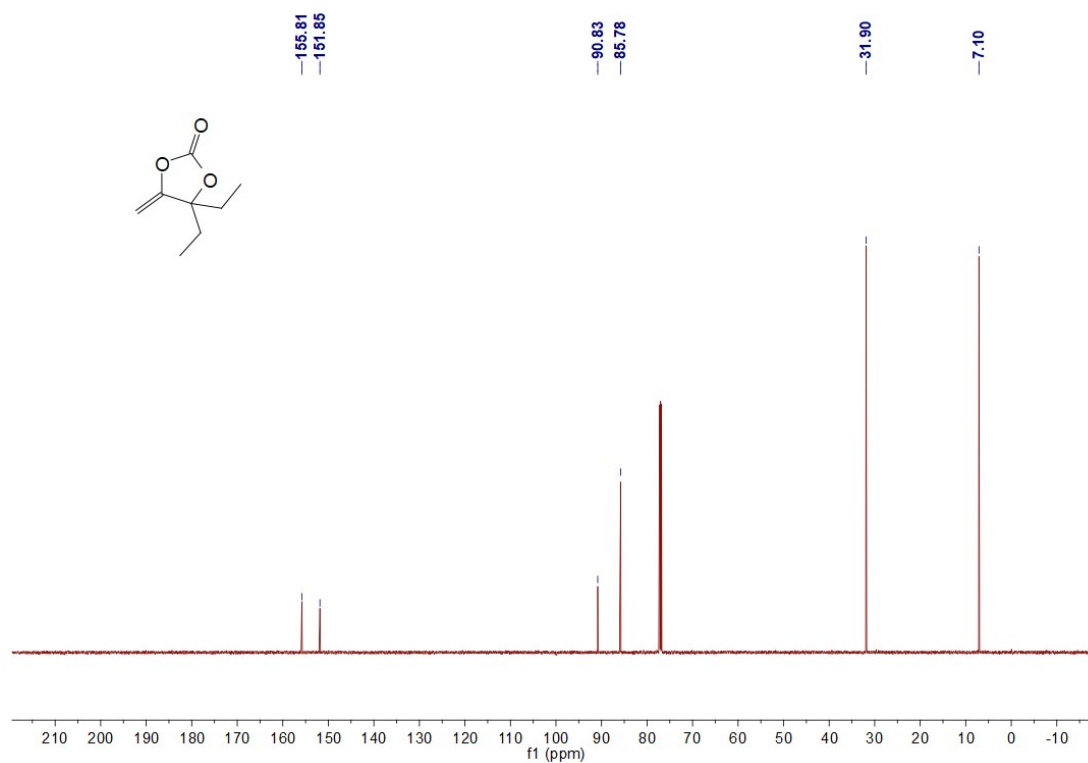

<sup>13</sup>C NMR spectrum of product **2c**

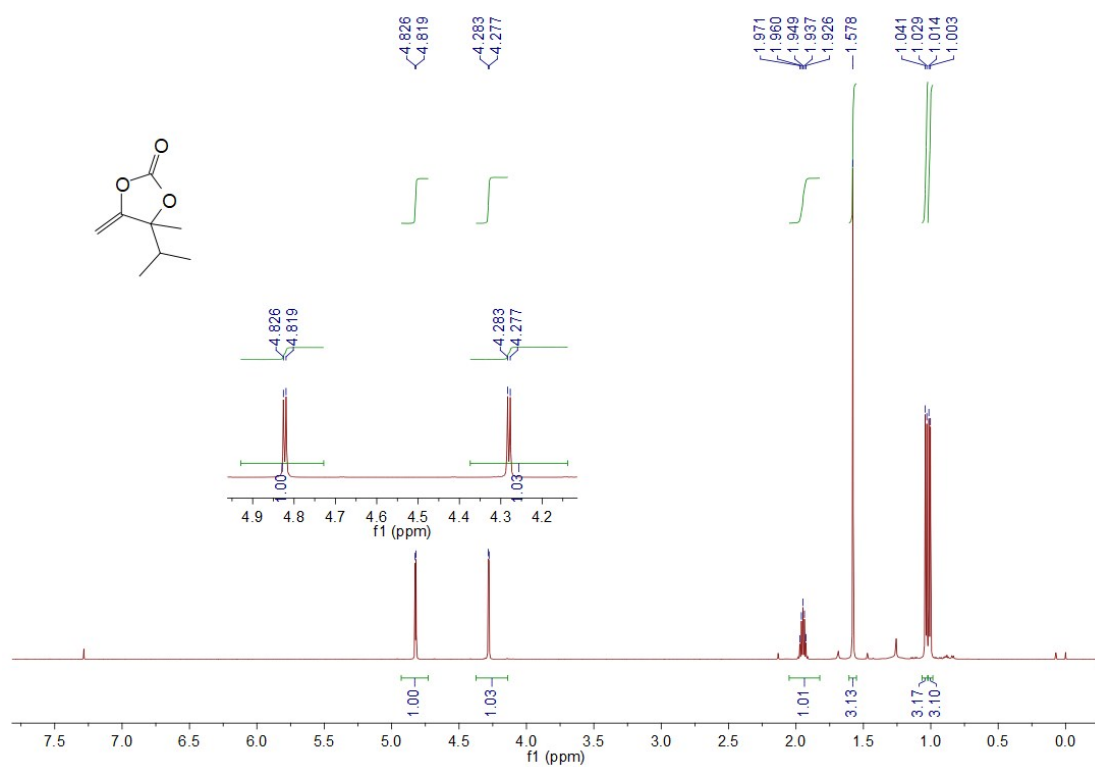

<sup>1</sup>H NMR spectrum of product *2d*

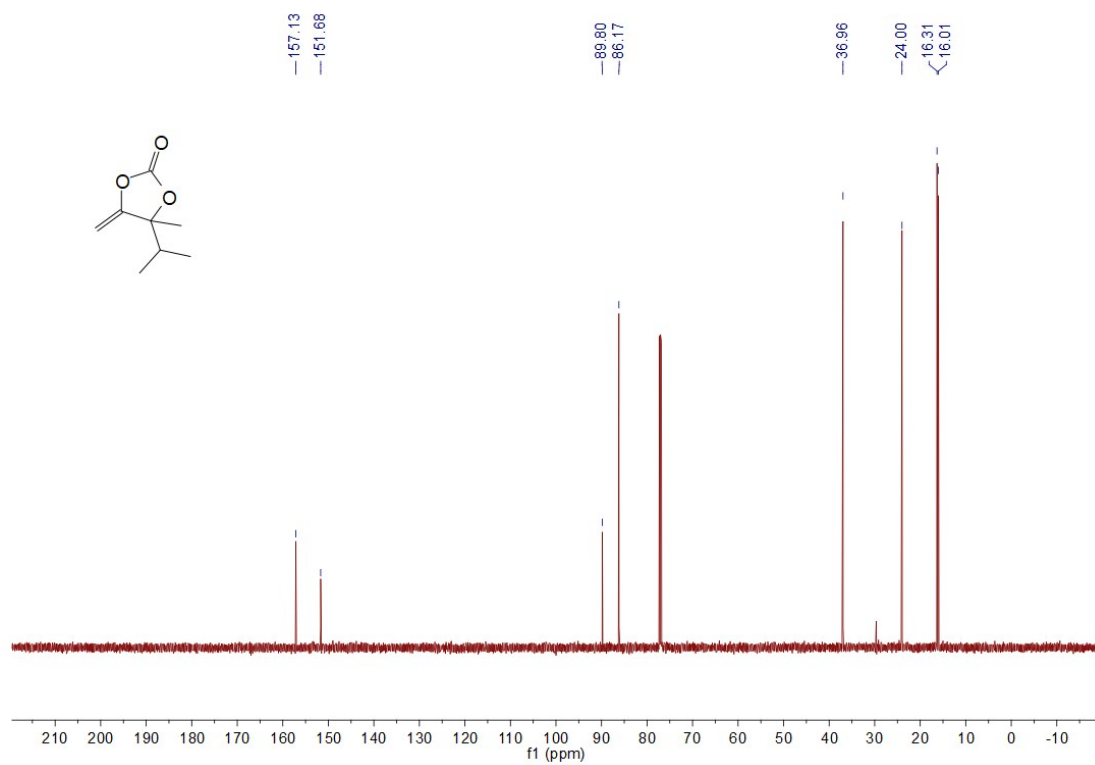

<sup>13</sup>C NMR spectrum of product *2d*

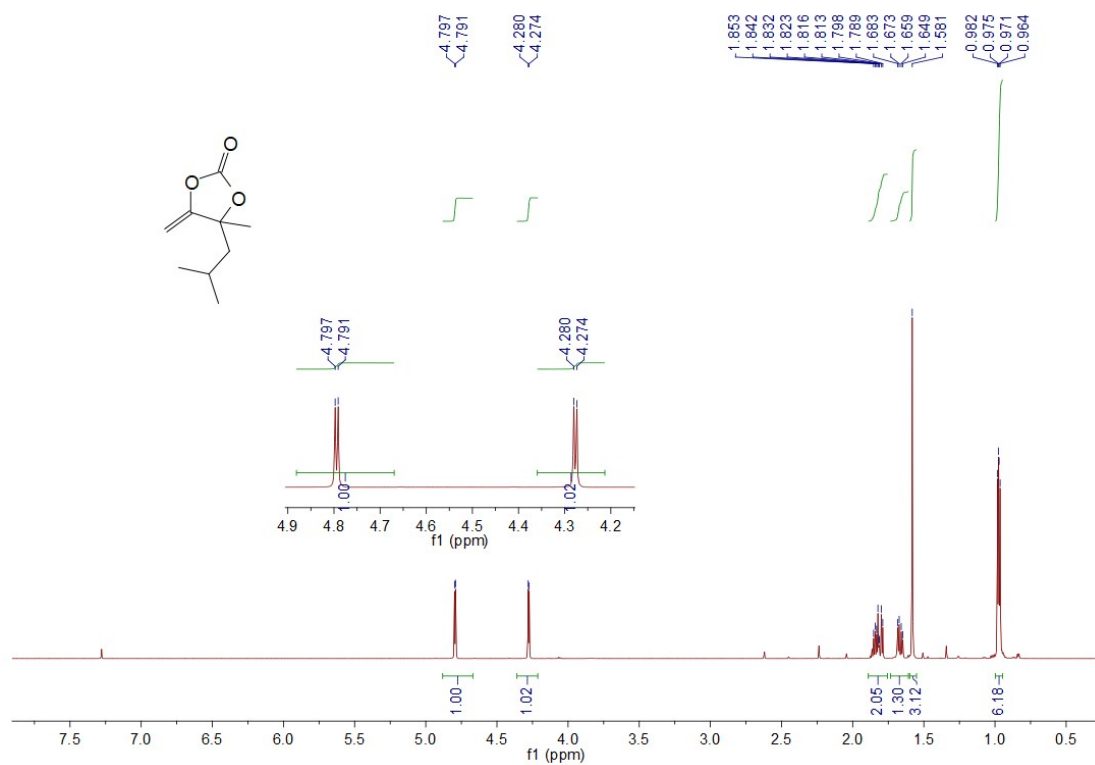

<sup>1</sup>H NMR spectrum of product **2e**

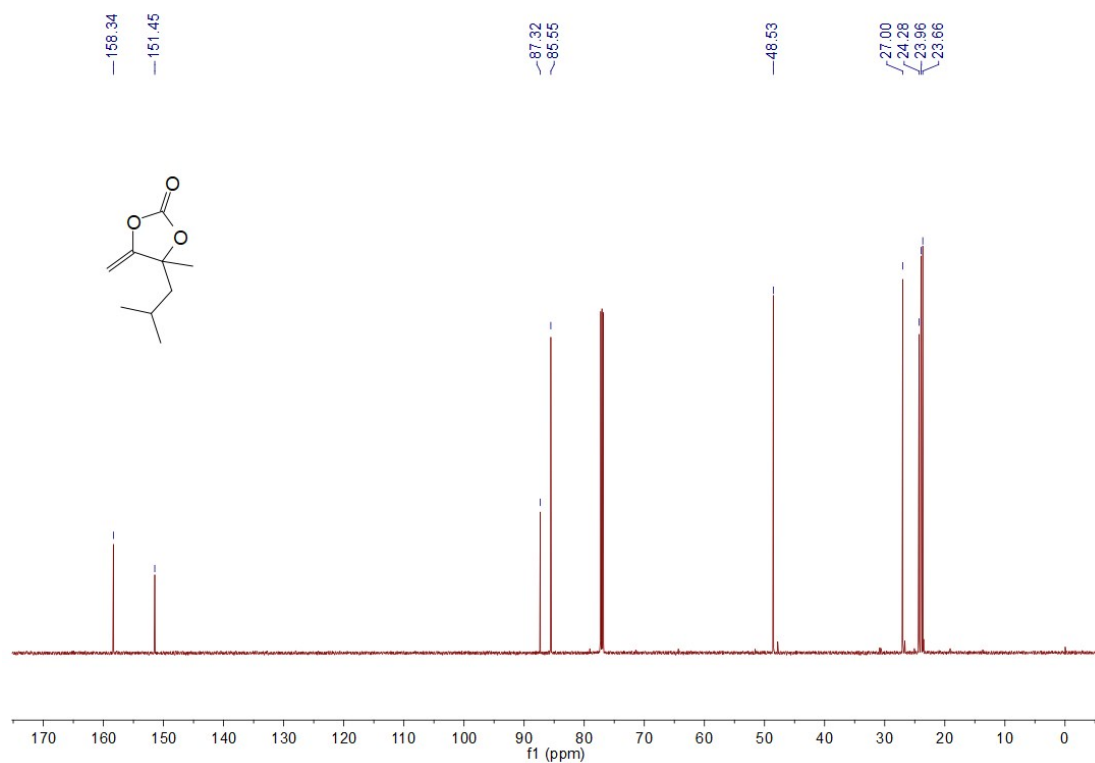

<sup>13</sup>C NMR spectrum of product **2e**

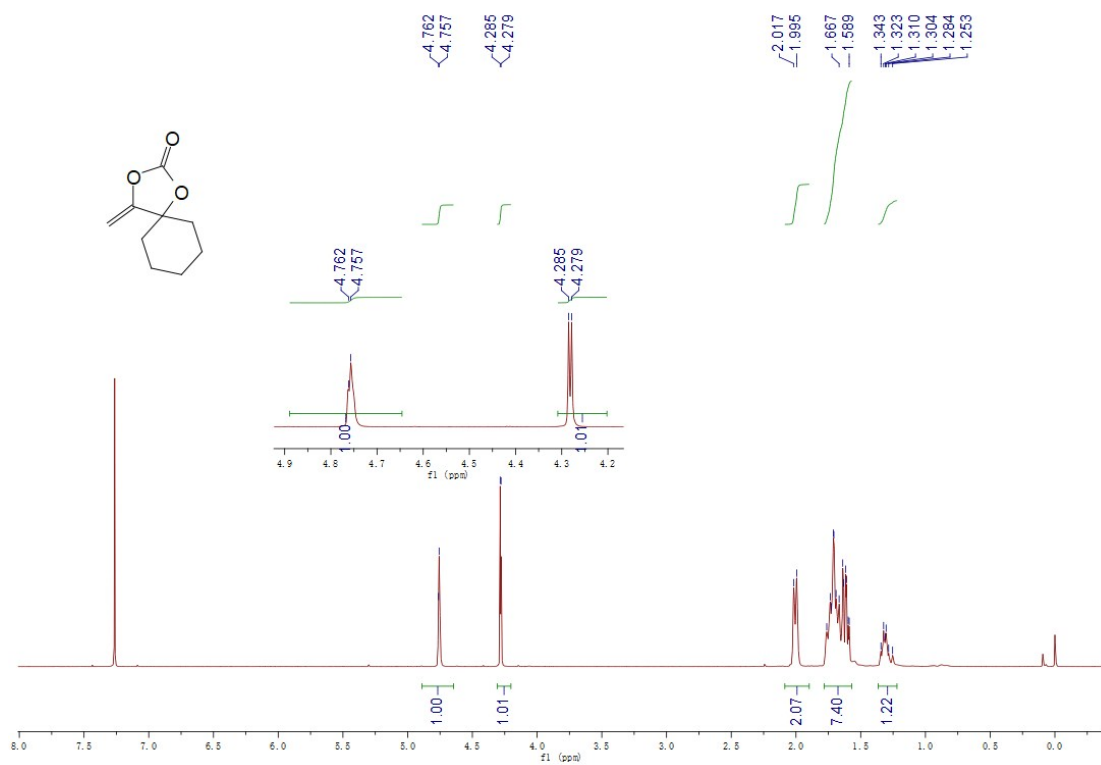

<sup>1</sup>H NMR spectrum of product **2f**

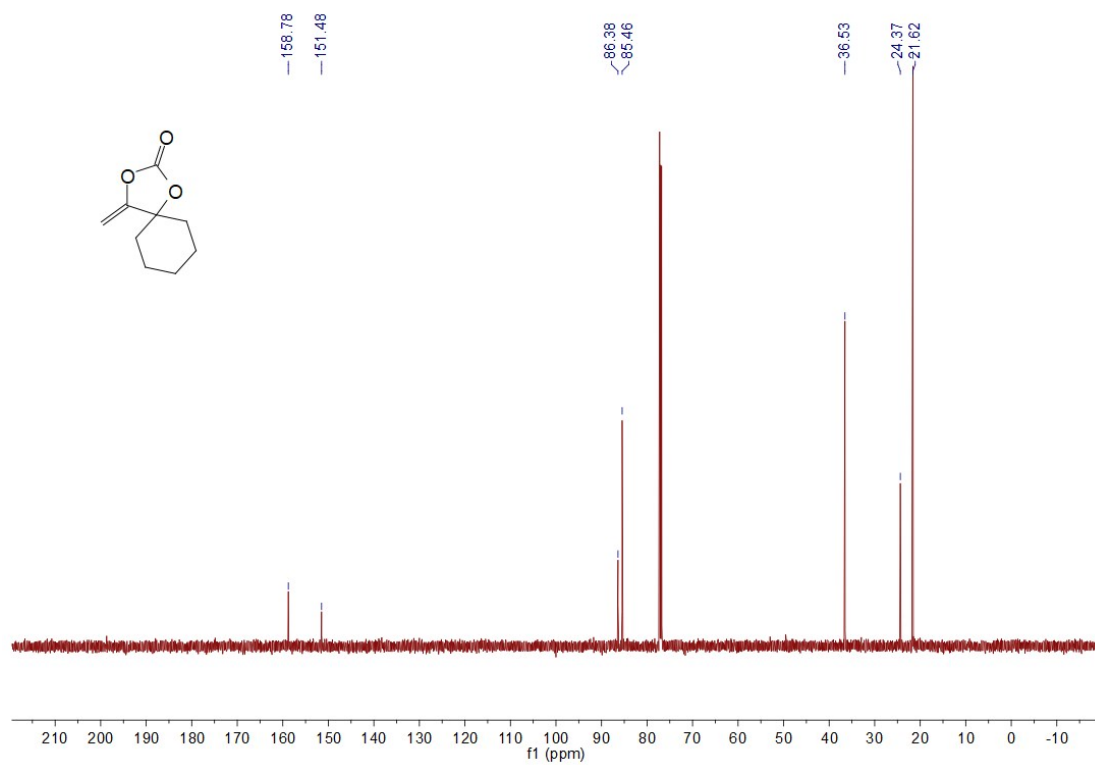

<sup>13</sup>C NMR spectrum of product **2f**

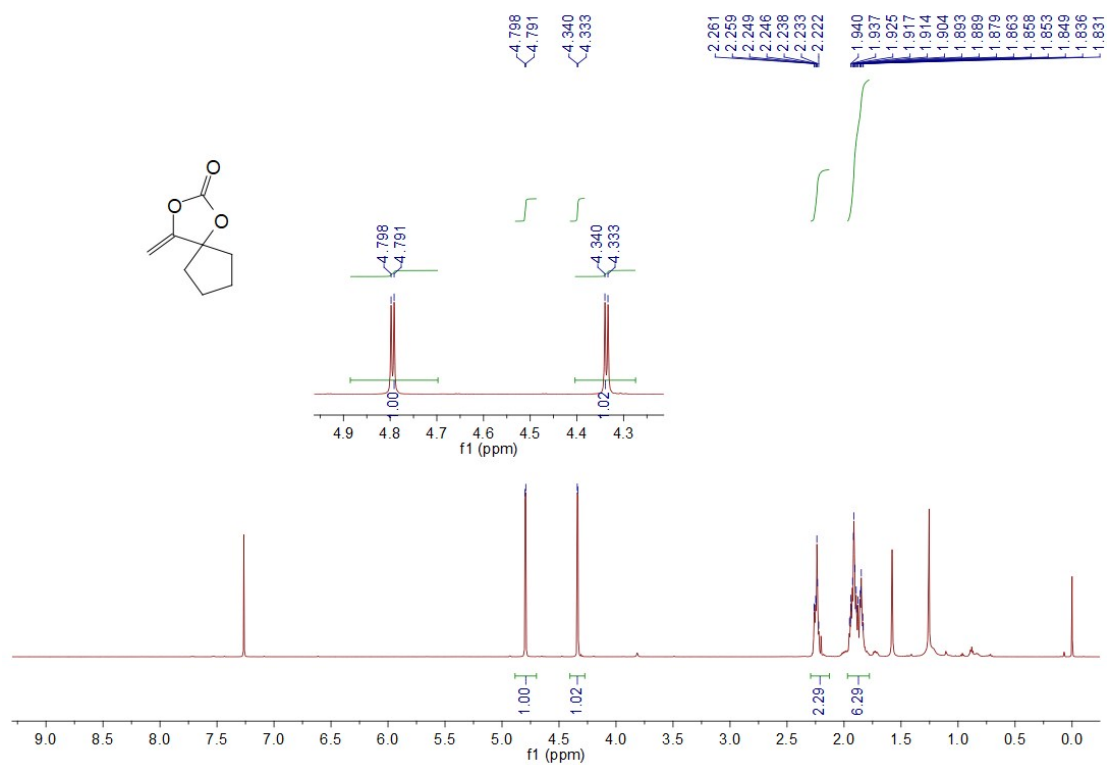

$^1\text{H}$  NMR spectrum of product **2g**

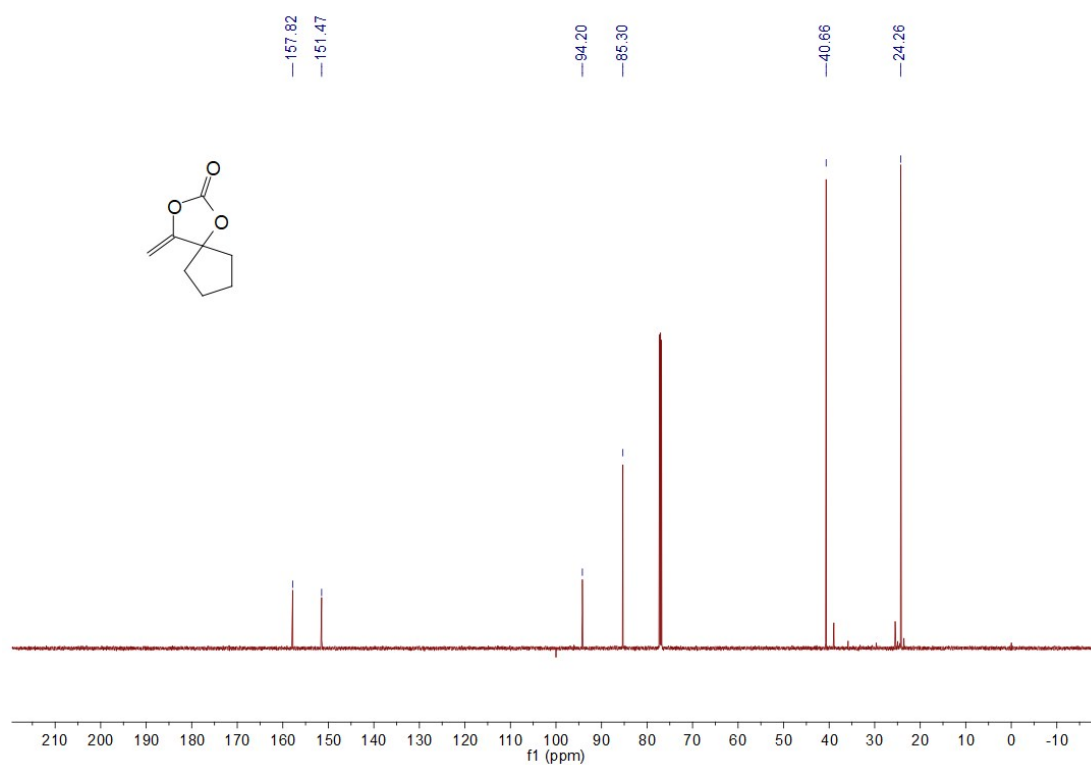

$^{13}\text{C}$  NMR spectrum of product **2g**

## Copies of MS Spectra of All Products

lan2018092901#691 RT: 5.87 AV: 1 NL: 2.49E4  
T: + c EI Fullms [50.00-650.00]

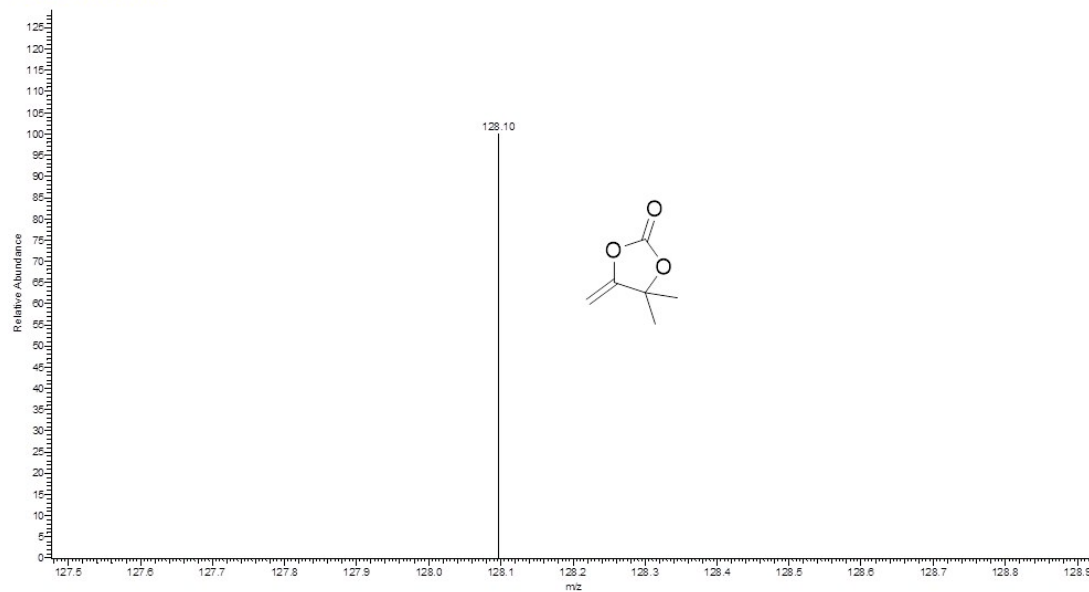

MS spectrum of product **3a**

lan2018092902#1719 RT: 8.34 AV: 1 NL: 1.02E4  
T: + c EI Fullms [50.00-650.00]

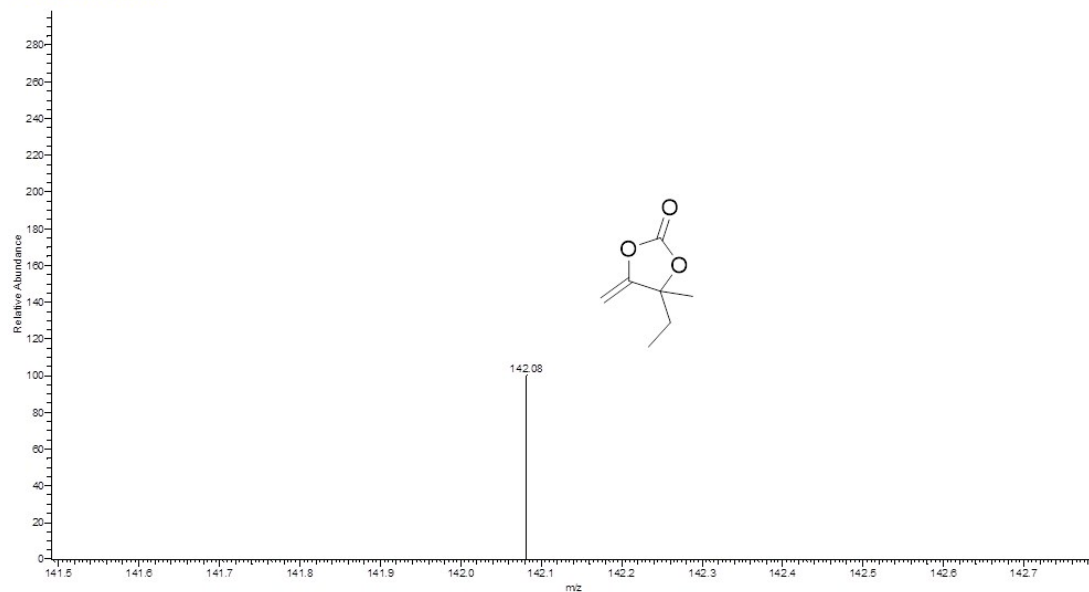

MS spectrum of product **3b**

lanxingwang2018092006 #2136 RT: 9.76 AV: 1 NL: 2.43E4  
T: + c EI Full ms [50.00-650.00]

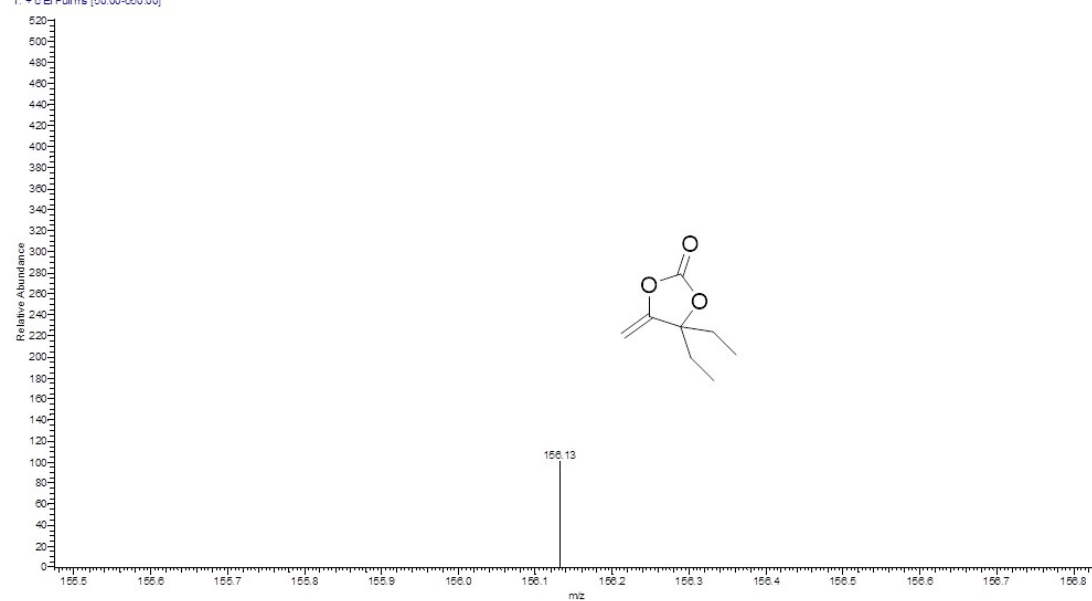

MS spectrum of product **3c**

lanxingwang2018092007 #2118 RT: 9.70 AV: 1 NL: 1.59E4  
T: + c EI Full ms [50.00-650.00]

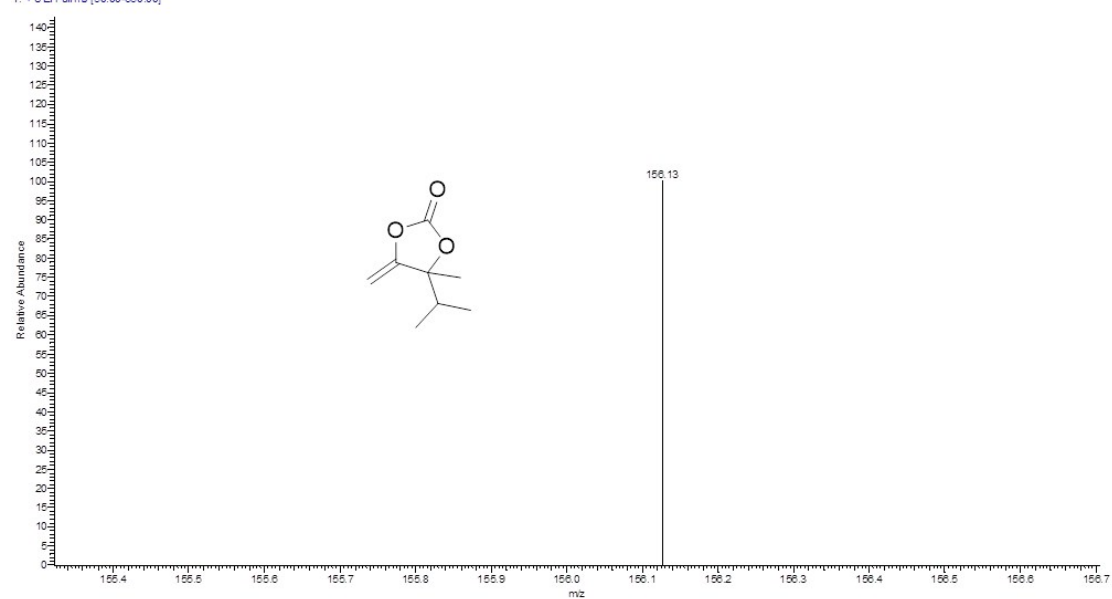

MS spectrum of product **3d**

lan2018120501#1687-1744 RT: 8.73-8.93 AV: 58 SB: 167 8.49-8.81 8.91-9.16 NL: 3.22E3  
T: + c EI Fullms [50.00-650.00]

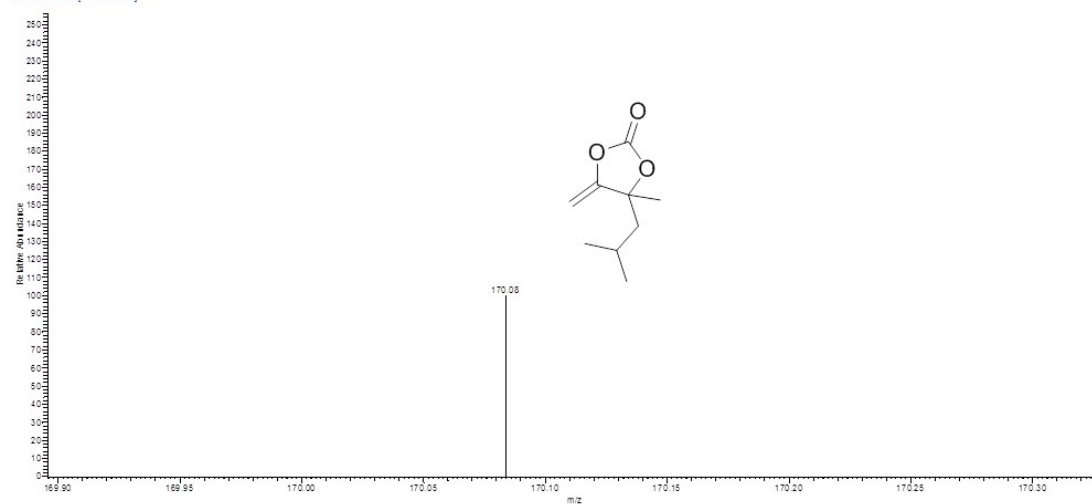

MS spectrum of product **3e**

lan2018092903#2646 RT: 11.50 AV: 1 NL: 2.55E5  
T: + c EI Fullms [50.00-650.00]

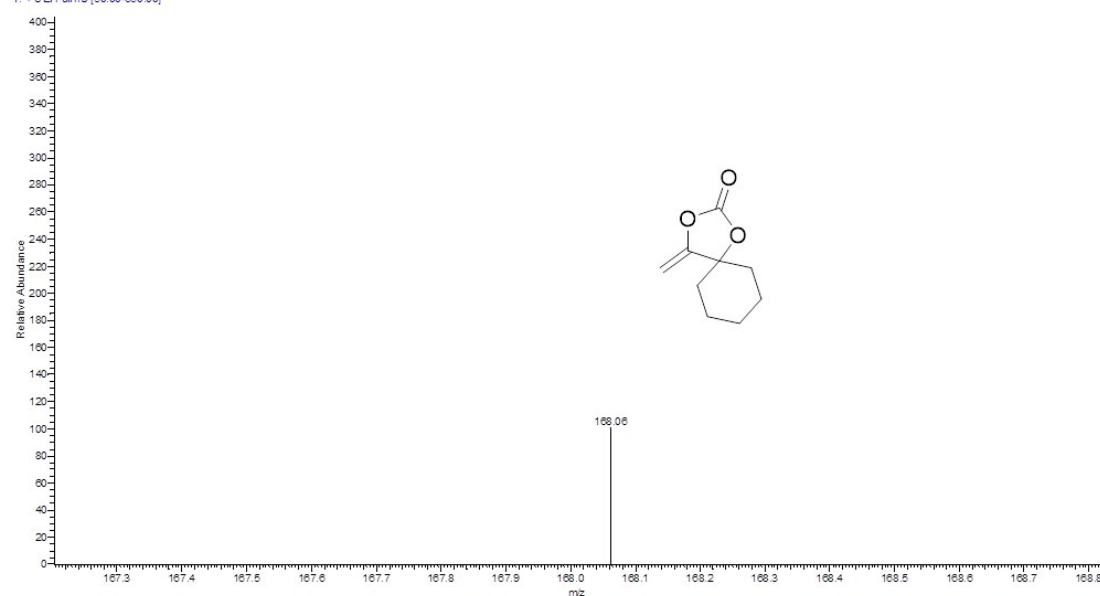

MS spectrum of product **3f**

lan01092008 #2438 RT: 10.79 AV: 1 NL: 7.06E3  
T: + c EI Fullms [50.00-650.00]

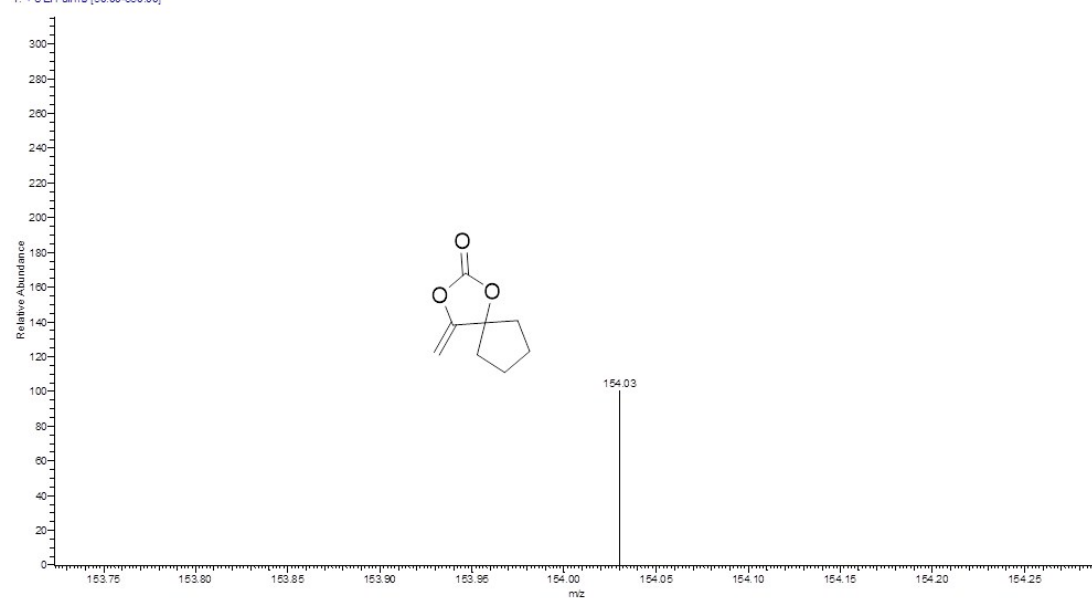

MS spectrum of product **3g**
